# Supplementary material for: Targeted therapy with the mutant IDH2 inhibitor enasidenib for high-risk IDH2-mutant myelodysplastic syndrome
Source: PubMed Central journal article supplement — Blood Adv. 2022 Aug 19;7(11):2378–87. doi: 10.1182/bloodadvances.2022008378 (PMC10220255; doi:10.1182/bloodadvances.2022008378), 2022-08-19

Supplementary Figure\*\*\*: CONSORT diagram of study cohorts and treatment until data-cut off on September 1<sup>st</sup>, 2021

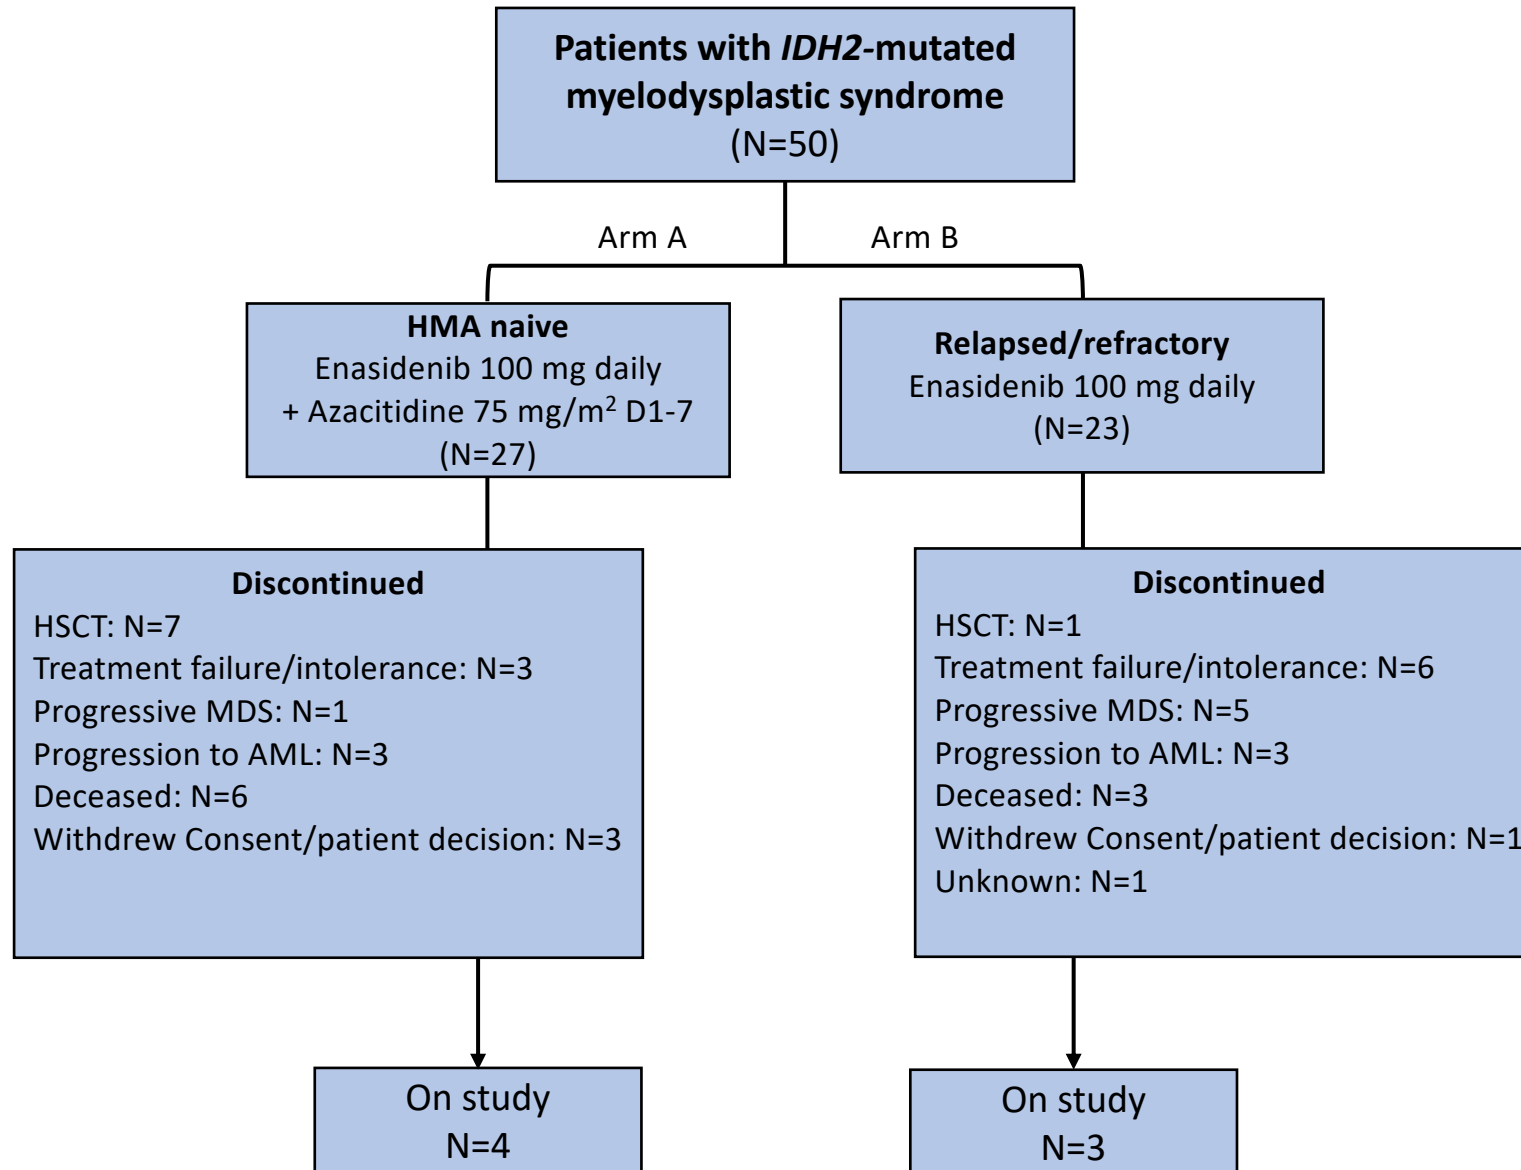

**Supplementary Figure:** Event free survival in patients treated within Arm A (ENA+AZA) and Arm B (ENA alone).

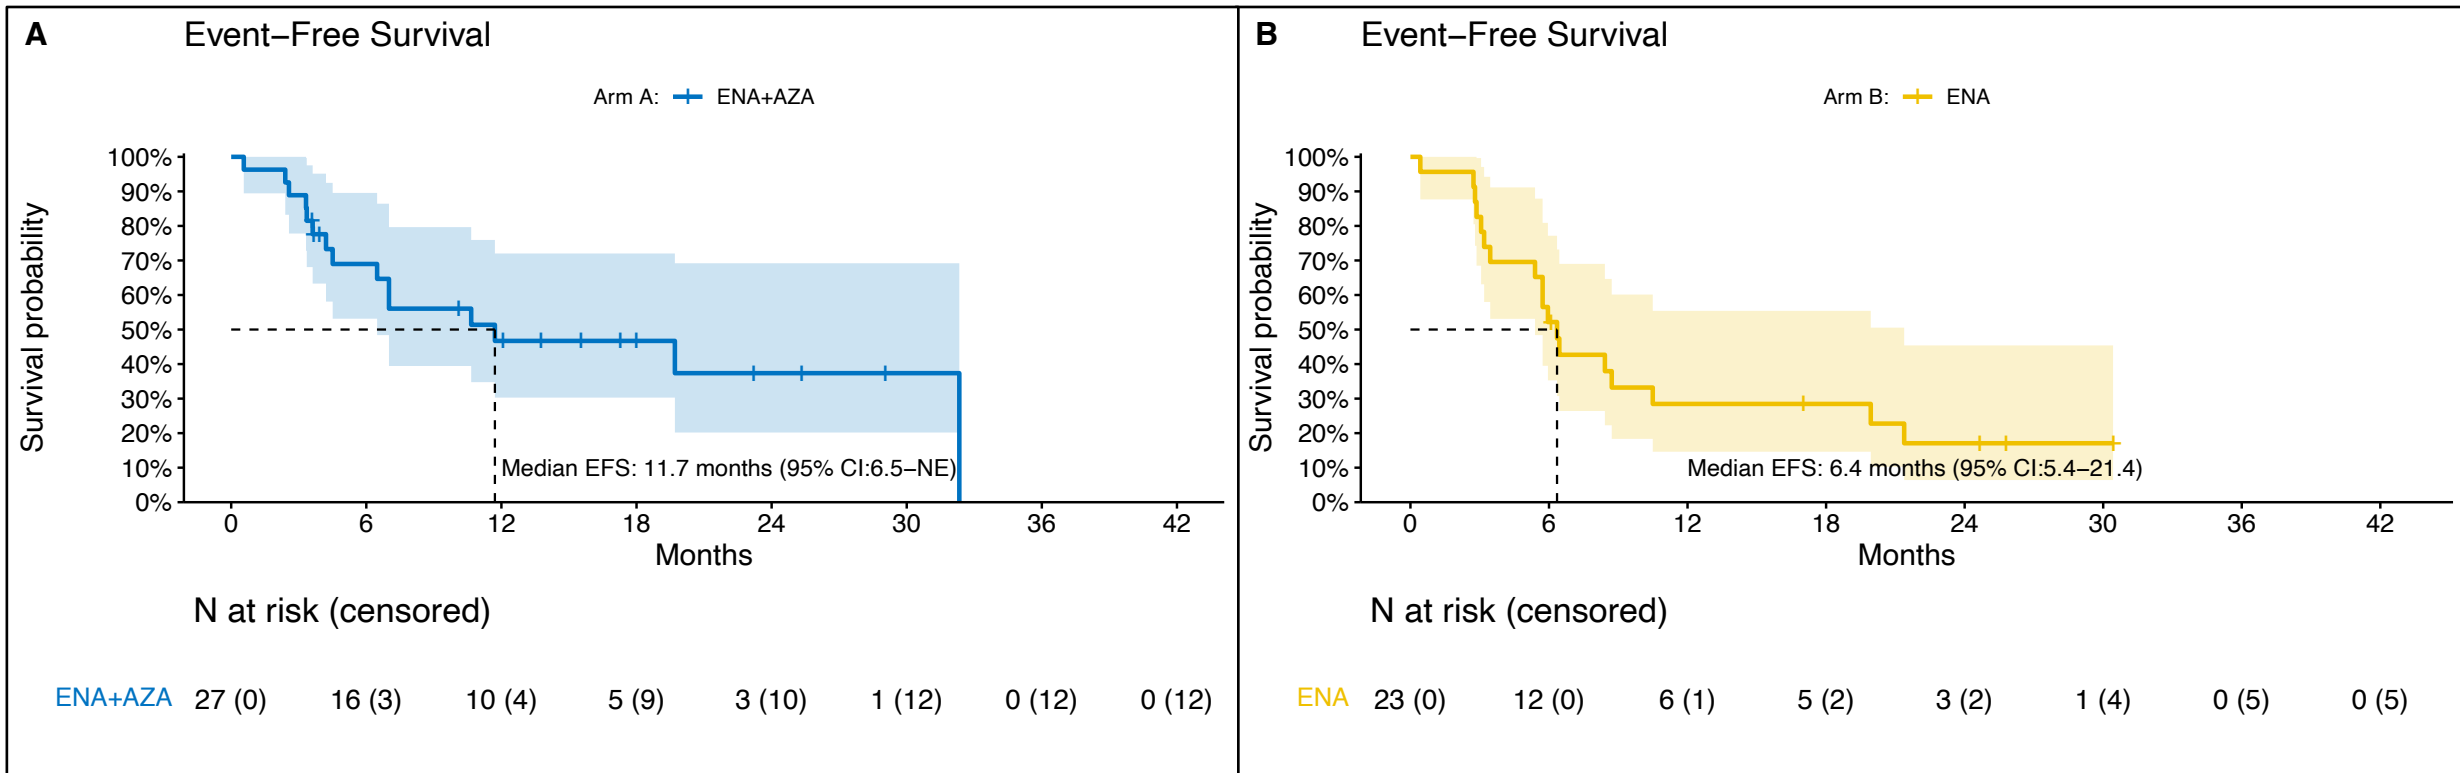

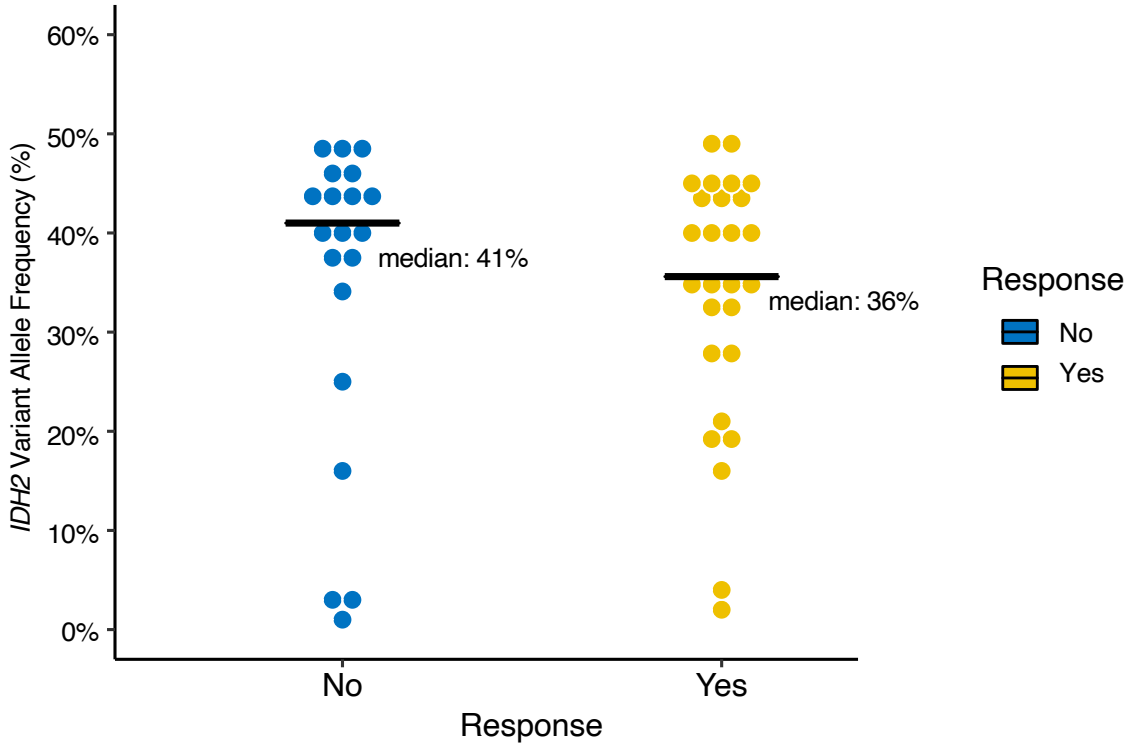

**Supplementary Figure:** Variant allele frequency by IDH isoform in patients with R140 or R172 IDH variants. No significant difference existed between VAFs (Wilcoxon-test; p-value: 0.50).

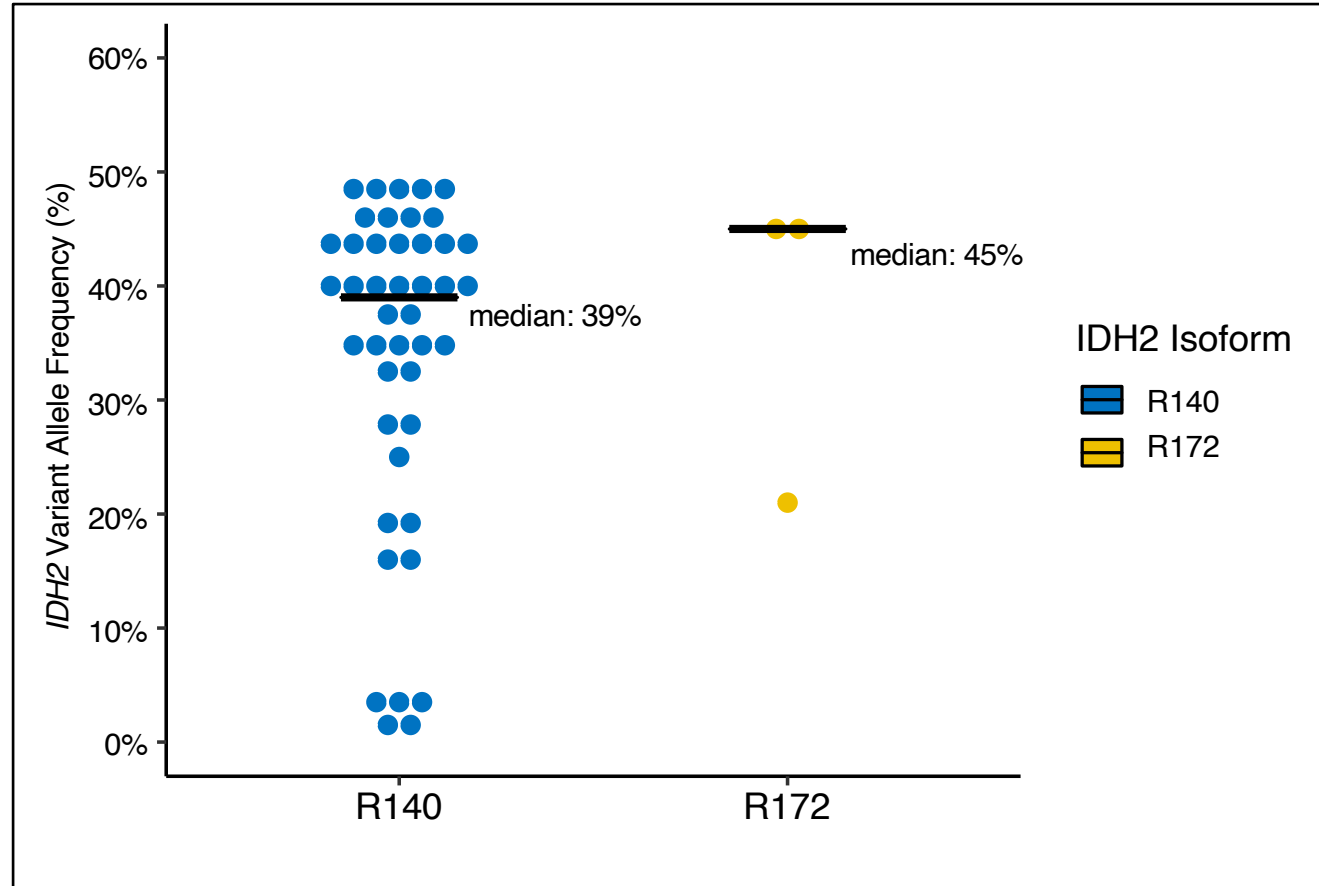

Supplement: BLOODA_ADV-2022-008378-mmc1.pdf [file BLOODA_ADV-2022-008378-mmc1.pdf]
